# Supplementary material for: Thymic dendritic cell-derived IL-27p28 promotes the establishment of functional bias against IFN-γ production in newly generated CD4+ T cells through STAT1-related epigenetic mechanisms
Source: eLife journal article supplement (doi:10.7554/elife.96868), 2024-04-26
Supplement: fig1-data1 [file elife-96868-fig1-data1-v1.zip]

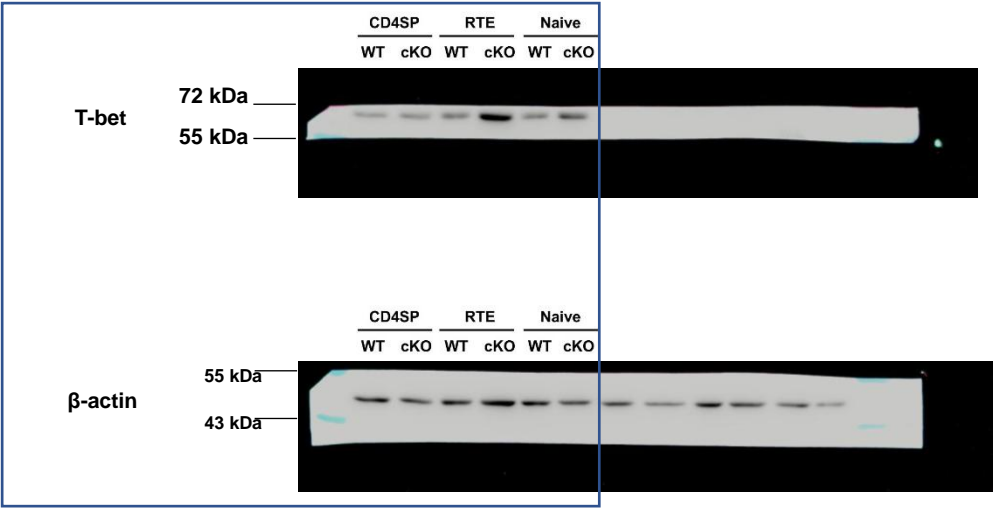

**Figure 1 Source data 1** Original membranes corresponding to Figure 1E. The upper membranes correspond to T-bet, and the lower membranes correspond to  $\beta$ -actin. Rainbow molecular weight markers were employed. The areas highlighted by blue boxes are used in this result figure.
