# Supplementary material for: Thymic dendritic cell-derived IL-27p28 promotes the establishment of functional bias against IFN-γ production in newly generated CD4+ T cells through STAT1-related epigenetic mechanisms
Source: eLife journal article supplement (doi:10.7554/elife.96868), 2024-04-26
Supplement: fig3-figsupp1-data1 [file elife-96868-fig3-figsupp1-data1-v1.zip]

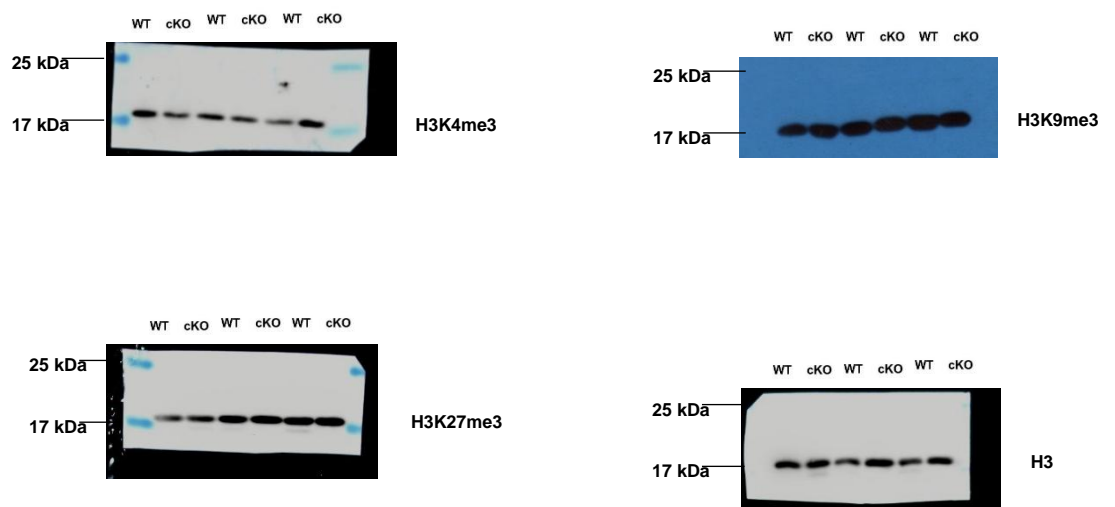

**Figure 3-figure supplement 1** Original membranes corresponding to Figure 3-figure supplement 1A. The left two lanes are shown in the paper.
