# Supplementary material for: Thymic dendritic cell-derived IL-27p28 promotes the establishment of functional bias against IFN-γ production in newly generated CD4+ T cells through STAT1-related epigenetic mechanisms
Source: eLife journal article supplement (doi:10.7554/elife.96868), 2024-04-26
Supplement: fig5-data1 [file elife-96868-fig5-data1-v1.zip]

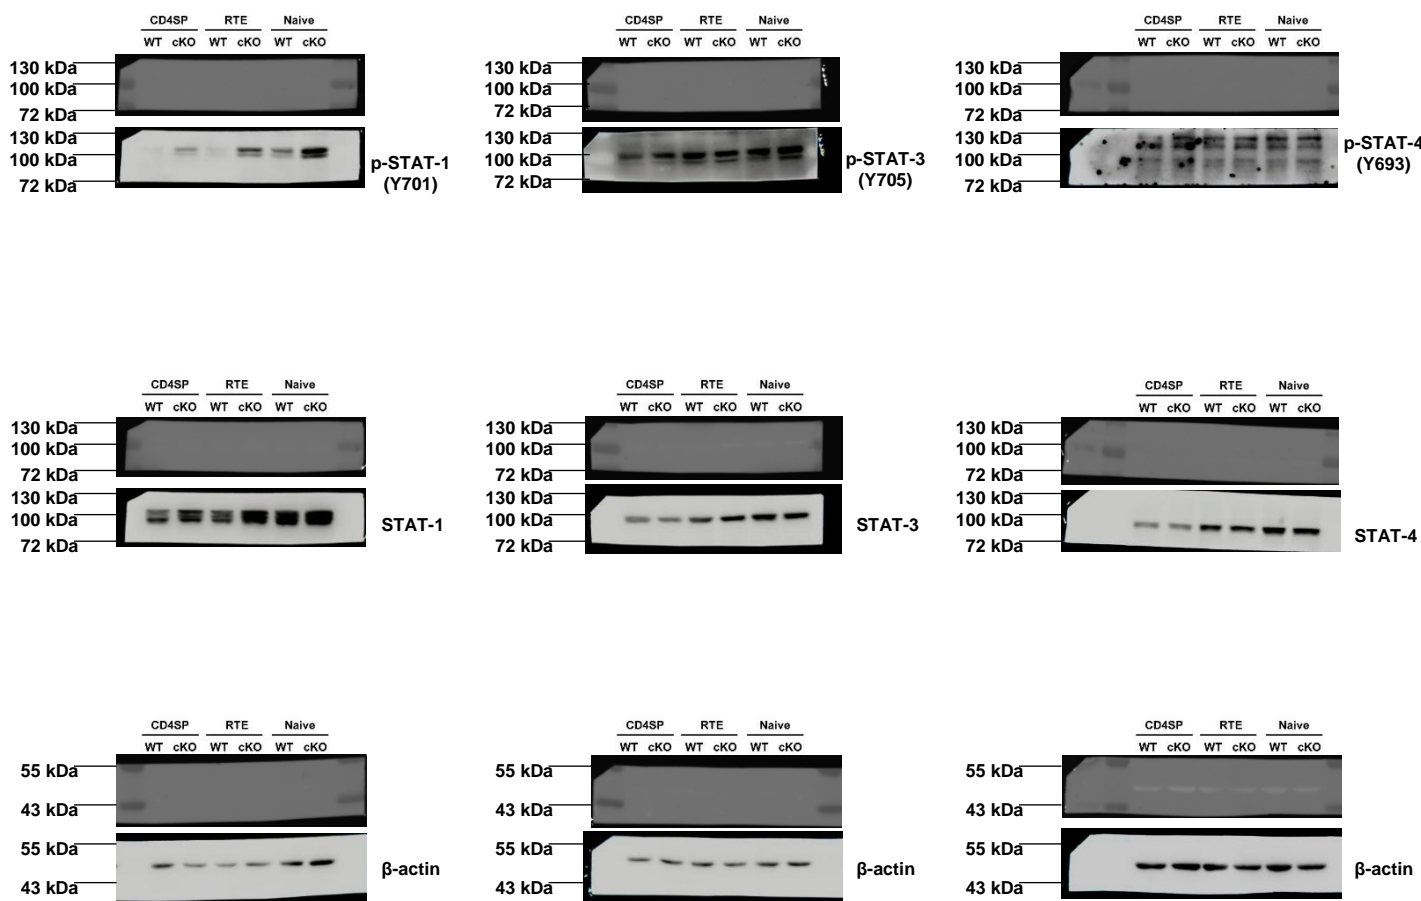

**Figure 5 Source data 1** Original membranes corresponding to Figure 5B. The upper panel displays the rainbow molecular weight markers under bright-field imaging, while the lower panel corresponds to the bands of the detected molecules within the expected molecular weight range.
