# Supplementary material for: Thymic dendritic cell-derived IL-27p28 promotes the establishment of functional bias against IFN-γ production in newly generated CD4+ T cells through STAT1-related epigenetic mechanisms
Source: eLife journal article supplement (doi:10.7554/elife.96868), 2024-04-26
Supplement: fig5-figsupp2-data1 [file elife-96868-fig5-figsupp2-data1-v1.zip]

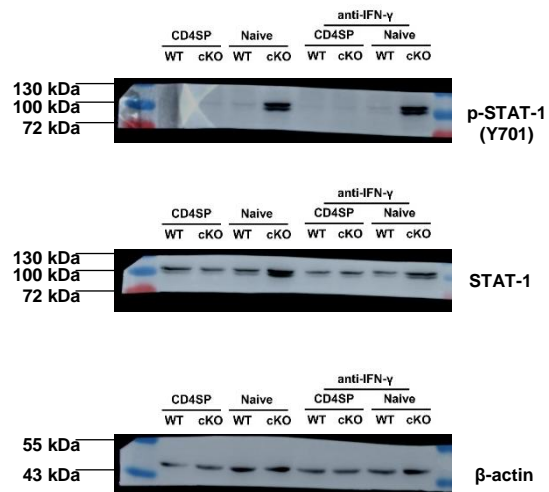

**Figure 5-figure supplement 2** Original membranes corresponding to Figure 5-figure supplement 2. The upper membranes correspond to p-STAT1, the middle membranes correspond to STAT1, and the lower membranes correspond to β-actin. Rainbow molecular weight markers were employed.
