# Supplementary material for: Thymic dendritic cell-derived IL-27p28 promotes the establishment of functional bias against IFN-γ production in newly generated CD4+ T cells through STAT1-related epigenetic mechanisms
Source: eLife. 2025 May 14;13:RP96868. doi: 10.7554/eLife.96868 (PMC12077877; doi:10.7554/eLife.96868)
Supplement: Supplementary file 2. [file elife-96868-supp2.xlsx]

## Sheet: Sheet3
NAME	WT1-FPKM	KO1-FPKM
Lypla1	51.4544	58.0448
Tcea1	39.9211	41.3428
Atp6v1h	23.4264	23.659
Oprk1	0	0
Rb1cc1	24.3252	27.0081
Fam150a	0	0
St18	0.0791824	0
Pcmtd1	27.3658	26.041
Adhfe1,Rrs1	19.4416	20.5159
3110035E14Rik	0	0
Sgk3	20.9102	17.6692
Mcmdc2	0.117438	0
Cspp1	20.1609	19.8269
Prex2	0	0
A830018L16Rik	0	0
Sulf1	0	0
Xkr9	0	0
Kcnb2	0	0
Terf1	20.2489	20.3375
Rdh10	6.52696	8.13218
Tmem70	22.8848	21.4494
Ly96	0.894308	3.56555
Gdap1	0	0
Pi15	0	0
Crispld1	0	0
Tfap2d	0	0
Tfap2b	0	0
Il17a	0	0
Paqr8	3.28546	1.99332
Efhc1	0	0.10228
Tmem14a	4.02938	1.95739
Gsta3	0.174567	0.378254
Khdc1a	0.242042	0.169923
Khdc1c	0.150372	0
Khdc1b	0	0
B3gat2	1.17185	1.97397
Col9a1	0	0
Lmbrd1	10.8184	12.8508
Lgsn	0	0
Pih1d3	0	0
Khdrbs2	0	0
Rab23	1.86234	1.22282
Dst	1.92211	1.21621
Imp4	20.5478	19.0228
Ptpn18	28.4782	34.8324
Prss39	0.0831898	0.195881
Cfc1	0	0
Amer3	0	0
Arhgef4	9.87274	9.10149
Plekhb2	19.0708	18.4665
Hs6st1	14.1964	12.8926
Arid5a	15.9333	20.6892
Fer1l5	0.0607847	0
Cnnm4	6.60263	6.05372
Cnnm3	11.7198	13.9835
Cox5b	25.4221	32.8957
Zap70	105.191	105.424
Cnga3	0	0
Inpp4a	19.6245	16.2736
Unc50	28.192	24.8187
Lipt1,Mrpl30	53.6685	64.9083
Eif5b	25.98	26.0063
Nms	0	0
Pdcl3	19.2806	21.4458
Npas2	0.575337	0.678407
Rpl31	35.737	35.6229
Cnot11	22.0049	20.265
Map4k4	89.4081	90.8499
Il1r2	0	0
Il1r1	0.0574691	0
Il1rl2	6.75495	4.40296
Il1rl1	0	0.108733
Il18r1	4.70921	4.65894
Il18rap	0.103276	0
Slc9a4	0	0
Slc9a2	0	0
Tmem182	0	0
Pou3f3	0	0
Mrps9	25.7988	23.7142
Gpr45	0	0
AI597479	13.0079	12.8544
Nck2	21.3569	17.536
1500015O10Rik	0	0
Tpp2	39.3521	42.5683
Bivm	3.29125	2.56156
Ercc5	12.6187	11.726
Gulp1	0	0
Col3a1	0	0
Wdr75	22.9586	25.5806
Dnah7b	0	0
Tmeff2	0	0
Sdpr	0	0
-	0.821911	0.880098
Stat4	19.4862	15.1431
Stat1	163.818	384.346
-	1.1739	1.15869
Tmem194b	20.1746	19.3597
Hibch	9.35901	9.98839
Mstn	0	0
Ormdl1,Osgepl1	35.3794	39.4249
Ccdc150	0	0.0592708
Coq10b	12.3099	7.67603
Hspe1	68.1765	62.2641
Mob4	30.5227	25.7843
Rftn2	0	0
Mars2	7.05469	4.92947
Plcl1	1.56033	1.82144
1700066M21Rik	7.27747	5.02181
9430016H08Rik	10.0776	10.2088
Spats2l	0.701881	1.16894
Sgol2	1.24734	1.59661
Aox1	0.0491988	0
Aox3	0	0
Aox4	0	0
Aox2	0	0.090916
Bzw1	148.701	152.905
Nif3l1	7.4432	5.5886
Ndufb3	68.4747	56.5977
-	4.08574	5.87414
Cflar	59.2188	67.415
Casp8	60.4346	76.603
Stradb	12.0225	10.044
Cdk15	0	0
Fzd7	0.192439	0.520201
Gm973	0	0.0470019
Nop58	58.4247	46.0594
Bmpr2	1.58443	1.24063
Fam117b	14.1324	11.5777
Carf	2.08929	1.9458
Nbeal1	5.53409	7.20406
Cyp20a1	4.17794	6.28358
Abi2	10.5821	9.34341
-	313.953	284.555
Cd28	169.331	185.986
-	2.04719	0.837625
Ctla4	15.7282	17.0221
Icos	53.3249	57.825
Pard3b	0	0
Nrp2	0.951916	0.987028
-	2.13038	1.4942
Eef1b2	262.478	274.514
Zdbf2	0	0
Adam23	0.0371291	0.040228
Fastkd2	5.57349	7.24046
Creb1	46.6833	45.9167
Ccnyl1	4.43854	5.52915
Pikfyve	8.49435	8.55768
Pth2r	0	0.119446
Crygf	0	0
Map2	0.324603	0.501529
Unc80	0	0.0331741
Rpe	29.2741	25.1627
Cps1	0	0
Spag16	0	0.090888
Vwc2l	0	0
Atic	39.2539	38.9586
Tmem169	0	0
Xrcc5	14.2734	13.1977
Smarcal1	6.7814	7.4968
Rpl37a	77.0034	84.3783
Igfbp2	0	0
Rufy4	0.298406	0.246985
Cxcr2	0	0.0851358
Arpc2	236.572	245.915
Gpbar1	0.291237	0
Pnkd	16.6665	11.0661
Gm216	0	0
Slc11a1	0	0
Ctdsp1	47.5588	52.3493
Vil1	0.113884	0.134645
Rqcd1	17.2116	17.0373
Plcd4	0	0.161273
Bcs1l	5.71581	6.45689
Stk36	0.0403845	0
Ttll4	18.2417	17.604
Cyp27a1	0	0
Wnt6	0	0
Wnt10a	0.538	0.588001
Cdk5r2	0	0
Fam134a	37.1533	40.0435
Zfand2b	20.1428	26.4945
Ankzf1	11.7904	12.7501
Stk16	15.6801	20.2925
Dnajb2	7.95462	10.1534
Des	0	0
Speg	0	0
Gmppa	14.6647	17.7296
Asic4	0	0
Tmem198	0.206488	0.336508
Inha	0	0
Stk11ip	9.69919	8.62259
Slc4a3	0	0
Sgpp2	0.0904529	0.506073
Mogat1	0	0.289858
Acsl3,Utp14b	5.94729	5.48907
Kcne4	0	0
Mrpl44	20.3337	19.2722
Nyap2	0	0
Rhbdd1	5.0614	5.11303
Col4a3	0	0.0225958
Mff	56.4426	54.6652
Agfg1	59.1373	61.4417
Ccl20	0	0
Daw1	0	0
Fbxo36	0.835344	0.90914
Gm7609	3.20555	5.50893
Gm7609	0.0724556	0.880369
Sp100	204.683	229.5
Sp140	10.3725	22.9208
Cab39	82.391	85.0959
Itm2c	54.525	53.099
Spata3	0	0
2810459M11Rik	0.144334	0.390319
Psmd1	32.2417	29.423
Armc9	2.40508	4.03375
B3gnt7	0	0
1700019O17Rik	0.0992877	0.108549
Ptma	710.994	713.316
Cops7b	9.26391	9.75579
Dis3l2	8.10719	9.98697
Akp3	0	0
Prss56	0	0
Chrnd	0	0
Chrng	0	0
Eif4e2	33.4811	36.9768
Efhd1	0.146067	0
Gigyf2	34.9672	29.1697
3110079O15Rik	0	0
Neu2	0	0
-	0.77994	1.33918
Inpp5d	40.6067	35.7368
Atg16l1,Sag	27.024	26.9384
Dgkd	101.795	97.0454
Ugt1a1,Ugt1a10,Ugt1a2,Ugt1a5,Ugt1a6a,Ugt1a6b,Ugt1a7c,Ugt1a9	0	0.122677
Mroh2a	0	0
Trpm8	0	0
Spp2	0	0
Sh3bp4	0.293664	0.372688
Agap1	0.224329	0.044238
Ackr3	0	0
Cops8	29.47	30.7886
Mlph	0	0
Prlh	0	0
Lrrfip1	81.9776	76.3348
Rbm44	1.35798	0.307434
Ramp1	46.5133	45.0735
Ube2f	16.3764	7.30168
Scly	5.23371	4.78364
Espnl	0.0689619	0.075112
Klhl30	0.274656	0
Fam132b	0.0711206	0.310657
Traf3ip1	4.73252	3.38595
Asb1	3.23423	4.46328
Twist2	0	0
Olfr1413	0	0
Olfr1412	0	0
Olfr1411	0	0
Olfr1410	0	0
Olfr12	0	0
Gpc1	3.56917	6.32088
Dusp28	2.47638	5.2248
Rnpepl1	36.2049	37.6342
Capn10	2.92369	4.80609
Gpr35	0	0
Aqp12	0	0
Agxt	0	0
Sned1	0	0
Pask	0.840009	1.83944
Ppp1r7	11.7606	14.5937
Ano7	0.112648	0
2017-09-02	39.4974	32.8755
Farp2	1.22998	1.71568
Bok	0	0
Atg4b	14.5486	16.2988
Ing5	8.52219	8.88653
D2hgdh	17.9884	21.5435
Gal3st2	0	0
Gm9994	0	0
Gm6086	0.000248019	0.00154883
Neu4	0	0
Fam174a	8.21682	9.52469
Gin1	23.5842	20.4502
-	0.366044	0.293458
Slco6d1	0	0
Cntnap5b	0	0
Cdh20	0	0
2310035C23Rik	30.9695	38.2466
Tnfrsf11a	0.0986556	0.0535304
Zcchc2	21.2899	26.0034
Phlpp1	3.51084	3.43817
Serpinb5	0	0
Serpinb12	0	0
Serpinb13	0	0
Serpinb11	0	0
Serpinb7	0	0
Serpinb2	0	0
Serpinb10	0	0
Serpinb8	0	0
Cdh7	0	0
Cntnap5a	0	0
Nifk	24.4795	25.9723
Clasp1	14.1003	9.47013
Tfcp2l1	0.0278939	0
Tmem185b	11.2227	17.695
Sctr	0	0
3110009E18Rik	10.2654	11.1646
C1ql2	0	0
En1	0	0
Ccdc93	12.6815	12.8305
Slc35f5	0.370307	0.131905
Gpr39	0	0
Mgat5	10.7534	10.6953
Acmsd	0	0
Ccnt2	40.9992	39.931
Rab3gap1	27.9178	32.4885
R3hdm1	35.966	30.0244
Ubxn4	38.9444	36.8971
Thsd7b	0	0
Yod1	11.0142	13.5942
AA986860	0.121751	0.200016
Fcamr	0	0
Pigr	0	0
Faim3	0	0
Il10	0	0
Eif2d	15.8496	14.1259
Ikbke	6.50657	6.26692
Fam72a	1.13823	0.762892
Avpr1b	0	0
Ctse	27.1246	39.8885
5430435G22Rik	0	0
Slc26a9	0	0
Pm20d1	0	0
Slc41a1	11.5553	11.181
Rab7l1	5.48774	10.775
Nucks1	35.5154	34.4965
Slc45a3	0.93626	0.622922
Elk4	93.3092	106.878
Lemd1	0	0
Klhdc8a	0	0
Nuak2	0.57021	2.31634
-	1.09497	1.20929
Dstyk	3.62088	5.08008
Rbbp5,Tmem81	29.465	31.3718
Lrrn2	0	0
Pik3c2b	6.54529	6.32594
Ppp1r15b	34.8437	39.1052
Plekha6	0.125596	0.137133
Golt1a	0	0
Kiss1	0	0
Ren1,Ren2	0	0
Etnk2	0	0
Fmod	0	0
Chit1	0	0
Chil1	0	0
Mybph	0	0
Myog	0	0
4933406M09Rik	0	0
Cyb5r1	9.3264	11.0557
Adipor1	35.7539	34.4397
Klhl12	7.84012	9.93324
Rabif	27.3537	32.1983
Kdm5b	41.2187	37.5974
Syt2	0	0
Ube2t	3.58639	2.74457
Arl8a,Ptpn7	77.1105	78.1604
Lmod1	0	0
Csrp1	60.1059	64.1875
Phlda3	2.03441	1.10046
Tnni1	0.206787	0
Lad1	12.2004	12.655
Tnnt2	1.24128	0.752198
Tmem9	14.3395	14.9558
Ascl5	0	0
Cacna1s	0	0
Kif21b	92.3618	93.4798
Ddx59	7.29842	6.58002
Kif14	0.996181	0.728168
Zfp281	66.5208	75.2197
-	10.3838	25.1011
-	2.04351	2.19628
Atp6v1g3	0	0
Dennd1b	16.8004	14.9379
Zbtb41	6.30639	5.95522
Aspm	1.50842	1.48953
F13b	0	0
Kcnt2	0	0
-	859.566	886.193
B3galt2	0.294052	0.157744
Glrx2	8.35838	8.96017
Uchl5	25.2918	19.9821
Brinp3	0	0
Ptgs2	0	0
Pdc	0	0
Tpr	56.0236	57.319
Ivns1abp	186.59	156.289
Trmt1l	22.4052	25.86
Fam129a	2.23721	1.62904
Edem3	17.0196	17.3523
Colgalt2	0	0
Apobec4	0	0
Arpc5	168.166	169.794
Ncf2	0.744257	0.730974
Nmnat2	0.0965976	0.105074
Shcbp1l	0	0.125886
Rgs8	0	0
Rgs16	6.81449	6.49616
Rnasel	14.5452	17.5678
Gm5531	0.1127	0.13861
Teddm1	0	1.09457
Glul	25.0701	27.5154
Zfp648	0	0
Stx6	31.5319	31.2124
Acbd6	25.8702	24.2678
Tor1aip2	54.6797	67.7581
Nphs2	0.0816117	0.351179
Abl2	10.2197	10.4801
Angptl1	0	0.111032
BC026585	0.378587	0.204931
Sec16b	0.176781	0.0959205
Astn1	0	0
Rfwd2	9.06314	9.22249
Tnr	0	0
4930523C07Rik	27.6052	28.4457
Mrps14	23.7647	18.8736
Rc3h1	23.3479	24.7111
Serpinc1	0.289516	0
Zbtb37	161.784	139.121
Cenpl	8.06171	6.68392
Ankrd45	0	0
Tnfsf4	0.68101	0.551034
Tnfsf18	0	0
Pigc	6.80293	7.27786
Vamp4	19.0767	17.4761
Myoc	0	0.096157
Kifap3	2.461	2.44464
Scyl3	17.3579	19.7142
Mettl18	4.2016	6.10306
Sele	0.0801474	0
Sell	175.211	220.515
Selp	1.08781	1.13029
F5	0	0
Slc19a2	2.06367	1.8247
Ccdc181	3.7997	2.22711
Nme7	7.15641	3.72465
-	0.960778	1.97325
Dpt	0	0
Gpr161	0.118936	0
Mpc2	29.0546	23.0314
Adcy10	0	0
Creg1	10.3795	9.18259
Cd247	220.385	249.261
Gpa33	0	0
Ildr2	0	0
Tada1	28.54	28.2471
Fam78b	0.0858575	0
Tmco1	8.97336	9.85459
Aldh9a1	22.4698	19.4785
Rxrg	0	0
Lmx1a	0	0
Rgs5	0	0
1700084C01Rik	0	0
Sh2d1b2	0	0
Sh2d1b1	0	0
1700015E13Rik	0	0
Olfml2b	0	0
Fcgr4	0	0
1700009P17Rik	0	0
Mpz	0	0
Nr1i3	0	0.186683
Apoa2	0	0
Adamts4	0	0
B4galt3	16.7412	16.7369
Dedd,Pfdn2	47.0445	56.8183
Pvrl4	0.0586734	0.0636717
Arhgap30,Tstd1,Usf1	151.933	155.74
F11r	0	0
Alyref2	3.84405	4.55805
Cd244	0	0.074931
Cd48	72.5852	85.731
Slamf1	16.6146	19.4673
Cd84	67.9543	64.0732
Slamf6	30.2944	24.8139
Copa	70.7663	78.8376
Pex19	14.6191	16.1638
Dcaf8	48.7742	47.0149
Igsf8	3.46169	3.24181
Kcnj10	0.0409638	0.0444627
Pigm	19.5819	18.9474
Slamf9	0	0.236807
Igsf9	0.31893	0.545644
Tagln2	46.5586	39.8008
Ccdc19	0	0
Vsig8	0	0
Crp	0	0
Olfr16	0	0
Olfr218	0	0
Olfr1404	0	0
Olfr418-ps1	0	0
Aim2	12.7859	17.2212
Pyhin1	95.1533	164.704
Pydc3	60.2519	77.2713
-	1.25028	1.91219
Olfr433	0	0
Olfr432	0	0
Olfr430	0	0
Olfr429	0	0
Olfr426	0	0
Olfr424	0	0
Olfr421-ps1	0	0
Olfr420	0	0
Spta1	0	0
Mptx1	0	0
Olfr417	0	0
Olfr248	0	0
Olfr414	0	0
Olfr220	0	0
Fmn2	0	0
Kmo	0.111353	0.359086
Wdr64	0	0
Exo1	1.17508	0.80984
Sdccag8	6.08009	5.19701
Zbtb18	32.1992	27.1471
1700016C15Rik	0	0
Gm16432	0	0
Desi2	20.2285	20.625
Cox20	54.1388	52.152
Efcab2	0.697196	2.23821
Kif26b	0.0219532	0.0239936
Cnst	16.025	17.3478
Sccpdh	0	0
Cdc42bpa	0.281058	0.231733
Itpkb	63.8292	69.5926
Parp1	36.0727	32.5748
Lin9	9.459	13.3333
Acbd3	24.1792	26.3747
Sde2	24.1961	20.269
Lefty2	0	0
Pycr2	20.0811	16.3027
Lefty1	0	0
Tmem63a	23.1982	23.3876
9130409I23Rik	0	0
Cnih4	7.9147	9.0945
Cnih3	0	0
Srp9	41.0934	45.1469
-	11.0208	11.9713
Trp53bp2	14.4544	14.3448
Capn8	0	0
Susd4	0.413405	0.318933
Tlr5	0	0
Dusp10	45.4857	48.1502
Rab3gap2	12.5543	11.3531
Bpnt1	8.22782	6.37198
Eprs	31.189	31.5624
Slc30a10	0	0
D1Pas1	0	0
Gpatch2	11.856	7.78513
Esrrg	0	0
Ush2a	0	0
Ptpn14	0.765732	1.11232
Angel2	37.5947	40.0365
1700022P22Rik	0	0
Nsl1	2.11592	1.45959
Batf3	0.617431	0
-	1.99014	0.983757
Tmem206	8.88385	7.31776
Ints7	28.5621	27.5641
Lpgat1	9.4404	6.69936
Nek2	1.83911	1.47059
Slc30a1	8.38324	9.07232
Rd3	0	0
Kcnh1	0	0
Irf6	4.84411	5.13265
A130010J15Rik	10.0429	11.143
G0s2	5.53905	5.18868
Lamb3	0.230512	0.701745
Plxna2	0	0
Cd34	0	0
Xkr4	0	0
Rp1	0	0
Sox17	0	0
Mrpl15	25.865	23.5848
Rgs20	0.166096	0
Npbwr1	0	0
Sntg1	0	0
Mybl1,Vcpip1	30.1824	34.7597
-	22.1254	37.0951
Tcf24	0	0
Ppp1r42	0	0
Cops5	28.6794	33.9621
Arfgef1	32.25	36.6439
Cpa6	0	0
Slco5a1	0.0668381	0
Prdm14	0	0.199114
Ncoa2	32.2769	31.8715
Tram1	123.624	122.89
Lactb2	9.53279	11.123
Eya1	0	0
Msc	0	0
Trpa1	0	0
Sbspon	0.233103	0.374536
4930444P10Rik	0	0
Rpl7	374.846	405.571
Stau2	0.814272	1.22466
Ube2w	19.9801	17.1289
Tceb1	71.981	75.8666
Jph1	0	0
Crisp4	0	0
Defb18	0	0
Defb41,Gm15386	0	0
Pkhd1	0	0
Il17f	0	0
Mcm3	22.1558	19.3282
Tram2	8.42407	5.28971
-	24.1756	30.2759
Kcnq5	0.604871	0.545662
Rims1	0	0
4933415F23Rik	0	0
Ogfrl1	0.51788	1.32347
Smap1	30.423	28.7853
1110058L19Rik	11.9326	13.9182
Fam135a	0	0
Col19a1	0	0
Bai3	0	0
Gm20172	0	0
4931408C20Rik	0	0
Gm597	0	0
Phf3	30.849	28.6573
Ptp4a1	42.3183	47.2074
Gm9839	0	0.164761
Gm5415	0	0
Prim2	8.18351	8.96345
Bag2	0.996621	0.67909
Zfp451	24.3234	22.8347
Gm15455	8.00205	7.28999
Bend6	0.218184	0.353513
Ccdc115	14.2622	12.5474
Prss40	0	0
Fam168b	95.4876	99.9685
-	0.674858	0.366231
Uggt1	21.0145	22.4161
Neurl3	7.61574	10.9919
Kansl3	23.1334	22.0018
Lman2l	33.1813	24.6325
Cnnm4	0.588014	0.772752
Ankrd23,Ankrd39	15.2476	12.0959
Sema4c	0.16324	0.235277
Fam178b	0	0
Actr1b	33.5998	37.0917
Tmem131	30.8995	30.5145
Coa5	46.8544	49.5999
Mgat4a	7.58247	8.08063
2010300C02Rik	0.813423	2.61554
Tsga10	0.566044	0.805404
Mitd1	39.6849	56.9596
Lyg2	0	0
Lyg1	0	0
Txndc9	10.2254	10.6379
Rev1	9.2424	7.59642
Aff3	17.4881	18.5096
Lonrf2	0	0
Chst10	16.5065	15.3002
Tbc1d8	0.632381	0.0653559
Rnf149	30.3973	29.983
Creg2	0	0
Rfx8	0.117454	0
Gm3646	0	0
Mfsd9	0.624496	0.915246
Tgfbrap1	9.4716	9.6931
Fhl2	1.76047	0.96033
Nck2	0	0
Uxs1	5.32241	7.89464
Mettl21c	0	0
Tex30	14.3898	10.5307
Kdelc1	2.78726	3.25336
Mettl21e	0	0
Col5a2	0	0
Slc40a1	0	0
Slc39a10	15.233	11.9285
Nabp1	71.5398	72.7561
Myo1b	0	0
Gls	65.1554	78.0875
Nab1	24.9155	27.3043
Mfsd6	11.7175	9.62752
Inpp1	36.4739	36.5331
1700019D03Rik	0	0.346047
1700019A02Rik	0	0
Pms1	5.26819	4.09419
Asnsd1	38.0634	33.9744
Dnah7a	0.0204492	0.0440065
Stk17b	259.248	256.676
Hecw2	0.04508	0
Gtf3c3	10.2694	12.1764
Pgap1	4.58871	4.1204
Ankrd44	76.7077	74.7245
Sf3b1	221.627	233.821
Hspd1	54.0827	47.1301
Boll,Mars2,Rftn2	2.87952	3.43821
Plcl1	63.9622	74.3643
Hsfy2	0	0
Satb2	0	0
Tyw5	7.02421	10.1137
Kctd18	15.4707	16.9217
Clk1	204.883	202.719
Ppil3	22.8335	22.3231
Orc2	12.7358	14.6931
Fam126b	7.19329	6.77217
Als2cr12	0	0
Trak2	26.0778	26.5075
Als2cr11	0	0
Tmem237	1.93094	3.13084
Als2,Mpp4	6.98654	7.9372
Sumo1	55.2876	54.5201
Ica1l	0.34792	0.300011
Wdr12	11.8478	12.113
Raph1	4.35188	3.36103
Cd28	0	0.13393
Ino80d	20.9594	21.6984
-	0.46016	0.995843
Ndufs1	35.8892	30.9218
Gpr1	0	0
Dytn	0	0
Mdh1b	0	0
4933402D24Rik	0	0.149377
Klf7	14.6756	12.9141
Mettl21a	7.68102	5.29159
Fzd5	0.142566	0.416515
Plekhm3	1.10187	1.01037
Akr1cl	0	0
Cryge	0	0
Crygd	0	0
Crygc	0	0
Crygb	0	0
Cryga	0	0
D630023F18Rik	0	0.236767
Idh1	2.44445	2.75555
Kansl1l	11.1395	10.0301
Acadl	19.3752	30.0286
Myl1	0	0
Lancl1	10.7443	11.5303
Erbb4	0	0
Ikzf2	33.6532	26.4127
Bard1	1.98329	1.90037
Abca12	0	0
Fn1	0.0892359	0.279669
Mreg	0.112787	0.12181
Pecr	0.438486	0
2017-03-04	0	0
Ankar	0	0
Igfbp5	0	0
Tnp1	0	0
Tns1	5.24355	6.58055
Cxcr1	0.282116	0
Arpc2	12.67	11.8876
Aamp	53.2782	50.1752
Tmbim1	0.412426	0.334276
Usp37	15.2934	14.0583
Zfp142	7.10549	6.93979
Rnf25	17.2136	17.4107
Prkag3	0	0
Fev	0	0
Cryba2	0	0
Ccdc108	0	0
Ihh,Nhej1	4.22971	2.96773
Slc23a3	0.264661	0.428104
Cnppd1	36.1085	41.6457
Abcb6	1.09793	1.35316
Atg9a,Glb1l	12.4118	14.3396
A630095N17Rik,Tuba4a	107.241	120.679
Ptprn	1.9582	1.86756
Resp18	0	0
Dnpep	19.1012	13.5387
Chpf	6.1449	6.62133
Obsl1	0	0
Epha4	0	0
Pax3	0	0
Farsb	27.3793	29.5348
Scg2	0	0
Ap1s3	15.3326	16.1767
Wdfy1	3.52213	5.44362
Serpine2	2.02537	1.67643
Fam124b	0.717035	0.67666
Cul3	85.828	90.3863
Dock10	57.4395	56.2033
Irs1	0.0237464	0
Col4a4	0	0
Tm4sf20	0.206215	0
Slc19a3	0	0
Sphkap	0	0
Pid1	0.0976041	0
Dner	0	0
Trip12	96.2082	89.6683
Slc16a14	0	0
A530032D15Rik	0.0245241	0.528276
C130026I21Rik	1.81304	14.1844
Sp110	113.734	133.366
A630001G21Rik	24.5388	22.9442
Gpr55	0.486236	0.314022
Htr2b	0	0
Ncl	92.4512	92.9186
Nmur1	0	0.237697
Pde6d	15.3306	17.0741
Nppc	0	0
Alppl2	0	0
Alpi	0	0
Ecel1	0.0692289	0
Kcnj13	0.562014	0.407833
Ngef	0	0
Usp40	6.11139	6.6191
Dnajb3	1.27357	1.64128
A730008H23Rik,Hjurp	92.9036	77.1369
Glrp1	0	0
Arl4c	99.8126	102.518
Gbx2	0	0
Asb18	0	0
Iqca	0	0
Col6a3	0	0
Rab17	0	0
Ilkap	45.549	45.0878
Hes6	24.3599	27.2057
Per2	1.31638	1.23561
Hdac4	23.8086	11.8665
Ndufa10	51.1865	53.031
Olfr1416	0	0
Olfr1415	0	0
Olfr1414	0	0
Myeov2	99.4617	123.082
Otos	0	0
Ankmy1	0.0534981	0.197978
Rnpepl1	1.68152	1.35112
Kif1a	0.0210193	0
2310007B03Rik	0	0
Mterfd2	6.22661	4.31934
Pask	1.79248	0.867596
Hdlbp	30.0729	28.1398
Stk25	31.0434	29.4772
Thap4	8.25568	9.42207
Dtymk	41.5558	53.5018
Pdcd1	9.24779	9.31615
St8sia4	28.6812	25.7143
Slco4c1	0	0
Slco6b1	0	0
Slco6c1	0	0
D1Ertd622e	17.6897	10.6872
Ppip5k2	22.5806	22.9085
Pam	1.48028	1.31944
Rnf152	0	0
Pign	10.8849	9.79015
Bcl2	65.4074	56.4608
Kdsr	9.97336	9.25521
Vps4b	38.7399	39.4168
Serpinb3a	0	0
Serpinb3d	0	0
Serpinb3b	0	0
Serpinb3c	0	0
Cdh19	0	0
Dsel	2.83677	1.94165
Tsn	41.7854	40.5223
Gli2	0	0
Inhbb	0	0
Ralb	3.61143	2.90625
Epb4.1l5	0.0815486	0.0439218
Ptpn4	8.74081	5.51773
Tmem177	1.93289	1.47521
Gm101	0	0
Tmem37	0	0
Dbi	62.6063	46.6754
Steap3	0.158625	0.0861388
Marco	0	0
Insig2	11.2907	10.7575
Htr5b	0	0
Ddx18	15.737	16.0564
Dpp10	0	0
Actr3	245.416	250.479
Lypd1	0	0
Nckap5	0	0
-	0	0.82636
Tmem163	0	0
Map3k19	0.0489978	0.265996
Zranb3	2.85604	3.0072
Lct	0.0316305	0
Mcm6	35.6986	30.1035
Dars	52.0331	59.044
-	362.951	377.905
Cxcr4	19.2829	19.5404
Cd55,Daf2	3.3686	2.29611
Zp3r	0.125708	0
C4bp	0	0
Pfkfb2	14.0497	13.8186
Il24	0	0
Il20	0	0
Il19	0	0.338266
Mapkapk2	39.0696	43.6426
Dyrk3	0	0
Rassf5	138.566	155.085
Ikbke	148.139	164.232
Srgap2	10.8617	9.58861
Mfsd4	2.39962	2.31681
Cdk18	0	0
Tmcc2	0.15337	0.0557933
Cntn2	0	0
Nfasc	0	0
Mdm4	129.828	129.762
Sox13	1.76398	1.45902
Snrpe	71.1782	78.4608
Zbed6,Zc3h11a	95.5638	92.4342
Lax1	23.0218	25.5122
Atp2b4	0.190824	0.118235
Optc	0	0
Prelp	0	0
-	1.22294	1.5854
Btg2	77.8653	71.9569
Adora1	0	0
Ppfia4	0.0860158	0.031259
Tmem183a	18.3758	22.9974
4931440L10Rik	0	0
Ppp1r12b	7.97302	7.47707
Lgr6	0.0581731	0
Ptprv	3.17885	2.98974
Gpr37l1	0	0
Elf3	0	0
Rnpep	14.2522	12.0776
Timm17a	21.9707	27.9752
Shisa4	0	0.647218
Ipo9	24.568	21.3052
Nav1	0.182487	0.0828122
Pkp1	0	0
Igfn1	0	0
5730559C18Rik	0	0
Gpr25	0.289409	0
Camsap2	10.1977	9.42554
-	1.6794	1.73909
Nr5a2	0	0
Ptprc	738.959	727.683
Nek7	29.4179	32.3799
Lhx9	0	0
2310009B15Rik	9.29998	10.0376
Crb1	0	0
Cfhr1	0	0
Gm4788	0	0
Cfhr2	0	0
Cfh	0	0
Cdc73	24.4887	21.2039
Trove2	1.8837	1.75758
Rgs2	27.8215	23.4163
Rgs13	0	0
Rgs1	10.0764	10.9023
Rgs18	0.18203	0.195312
Pla2g4a	0.187938	0.403516
BC003331	8.04083	7.10143
Prg4	0.594017	0.423673
Hmcn1	0	0.0125921
Swt1	8.10361	8.37814
Rnf2	42.9593	38.6795
1700025G04Rik	11.553	10.1365
-	1.6904	1.20604
Tsen15	8.19516	5.70269
Rgl1	0.350186	0.381375
Smg7	45.3503	47.6284
Lamc2	0	0
Lamc1	1.64522	1.29578
Dhx9	89.3932	86.4074
Npl	0	0
Rgsl1	0.116775	0.126945
5830403L16Rik	0.186955	0.201373
Cacna1e	0.11651	0.0721184
Ier5	45.2307	50.2268
Mr1	7.32867	5.07864
-	0.399599	1.37825
Xpr1	13.3676	13.4421
Lhx4	0	0
Qsox1	31.5708	34.1535
Cep350	23.7301	25.8943
Tor1aip1	46.2228	59.6756
Fam163a	0.10551	0
Tdrd5	1.86832	1.86836
Soat1	20.6021	16.2457
Tor3a	4.16095	5.1658
Fam20b	15.622	15.9805
Ralgps2	20.283	23.85
Tex35	0.255285	0
Rasal2	0.0242932	0
Brinp2	0	0
Pappa2	0	0
Tnn	0	0
Cacybp	50.2862	48.3131
Rabgap1l	23.2732	20.7787
Gpr52	0	0
Zbtb37	17.1917	15.2846
Dars2	3.76075	3.77246
Klhl20	20.0009	17.6736
4930469G21Rik	0	0
Prdx6	92.0861	89.6892
-	28.9797	27.6539
Fasl	0.866442	0.52726
Suco	22.5846	26.5988
4930558K02Rik	0	0
Dnm3	0.0653018	0.0505092
Mettl13	6.4654	6.65147
7420461P10Rik	0	0
Prrc2c	102.137	109.553
Fmo4	0	0
Fmo1	0	0.112541
Fmo2	0	0
Fmo6	0	0
Fmo3	0	0
Mroh9	0	0
Prrx1	0	0
Gorab	4.09719	4.13139
Mettl11b	0	0
BC055324	3.75961	2.14278
Blzf1	6.08426	5.84731
Atp1b1	60.2777	54.3484
Dpt	2.21578	1.35431
Xcl1	9.20855	1.52952
Tbx19	0	0
Sft2d2	37.362	36.2478
Tiprl	14.7747	10.6612
Dcaf6	17.972	14.271
Mpzl1	0.113045	0.915895
Rcsd1	65.6715	70.5873
Pou2f1	12.7896	13.7684
-	0.469595	0.943318
-	0.478864	0.775877
Dusp27	0	0
Mael	0	0
Pogk	5.10469	5.93008
Gm4846	0	0
Gm4847	0	0
Fmo9	0	0
Uck2	48.3348	44.0308
Mgst3	3.88721	3.6884
Lrrc52	0	0
Pbx1	0	0
Nuf2	3.64336	2.91067
Rgs4	0	0
Hsd17b7	1.90195	1.92905
Ddr2	0	0
Uap1	13.7645	13.0508
Uhmk1	44.0433	48.6992
Gm7694	0.106528	0.0581014
Nos1ap	0	0.153816
Atf6	5.12318	3.54462
Dusp12	10.9858	11.9565
Fcrlb	0	0
Fcrla	0.151487	0
Fcgr2b	0.16345	0.534637
Fcgr3	0	0
Sdhc	51.2228	58.4898
Pcp4l1	0	0
Tomm40l	8.74104	9.10324
Fcer1g	1.31638	0.478599
Ndufs2	62.5919	72.1269
Ppox	14.4731	17.2176
Ufc1,Usp21	46.837	41.849
Nit1	25.017	22.59
Klhdc9	0	0
Itln1	0	0
Ly9	63.5438	66.2984
Slamf7	0.228838	0.247928
Slamf6	1.31907	2.84676
Vangl2	8.60153	8.99123
Nhlh1	0	0
Ncstn	28.8891	35.1929
Pea15a	20.9236	20.4913
Casq1	0.112314	0.121712
Atp1a4	0	0
Atp1a2	0.599383	0.537671
Kcnj9	0	0
Slamf8	0	0
Fcrl6	0	0
Dusp23	1.21406	0.494659
Apcs	0	0
Olfr1408	0	0
Olfr1406	0	0
Fcer1a	0	0
Mptx2	0	0
Darc	0	0
Cadm3	0	0
-	59.1546	114.272
BC094916	10.5355	26.0274
Pydc4	74.2988	179.567
AI607873	0.0595195	0.0646889
Ifi203,Ifi204,Mndal	231.413	377.382
Mnda	0.249387	0.74545
Ifi202b	0	0
Ifi205	0.270808	0.688378
Olfr231	0	0
Olfr419	0	0
Grem2	0	0
Rgs7	0	0
Fh1	21.5108	18.8567
Chml,Opn3	2.5252	2.2237
Pld5	0	0
Cep170	7.65716	7.01915
Akt3	12.8914	11.4043
Adss	52.0876	43.8833
Hnrnpu	302.52	307.252
Smyd3	5.81906	5.74933
Tfb2m	16.2152	16.7983
Ahctf1	18.9828	21.2869
Adck3	2.0997	3.08833
Psen2	12.0636	11.127
6330403A02Rik	0	0.0327991
Mixl1	0	0
H3f3a	416.963	435.338
Ephx1	71.6598	75.261
Nvl	30.3225	28.1007
Wdr26	105.135	101.09
Ccdc121	0	0
Lbr	74.8355	75.9785
Enah	0.0245223	0.0793381
Vmn1r1	0	0
Degs1	32.8865	30.8744
Fbxo28	17.498	17.733
Capn2	23.8672	21.5653
4922505E12Rik	0	0
1700056E22Rik	1.65142	1.03287
Hlx	0	0.101386
Marc1,Marc2	26.7564	31.335
C130074G19Rik	0	0
Mark1	0	0
Iars2	19.4857	20.7281
Lyplal1	0	0
Tgfb2	0	0
Rrp15	14.8246	12.3045
Spata17	0	0
Kctd3	11.4168	11.6631
Kcnk2	0	0
Cenpf	2.12141	1.51686
Smyd2	9.47571	9.46154
Prox1	0	0
Rps6kc1	1.91522	2.24124
Vash2	0	0.181789
Mfsd7b	15.7113	14.2621
Tatdn3	5.22789	5.58404
Fam71a	0	0
Atf3	0	0
Nenf	4.32561	7.27162
Ppp2r5a	90.8514	88.2905
Dtl	5.51991	4.2151
Traf5	7.31619	8.49855
Rcor3	7.226	6.65303
Hhat	2.21692	1.34366
Sertad4	0.163362	0
Syt14	0	0.279517
Diexf	11.5023	10.0029
Traf3ip3	97.1441	98.2561
Hsd11b1	42.0383	41.1327
G0s2	4.6315	4.77009
Camk1g	0.0795333	0.260641
Cd46	2.79247	3.43925
Cr1l	50.8277	47.6709
Cr2	0.0900789	0
-	6.18996	20.0965
-	22293.2	66346.4
-	9.27454	9.28659
-	16.1227	27.7004
-	0.188736	0.255315
-	0.409409	0.590757
-	10.5242	11.5745
-	117.328	84.6491
-	17.9469	19.4223
-	19.7176	19.813
-	149.306	171.562
-	26.0589	33.914
-	26.4237	42.894
-	5.29914	8.7531
-	4.42683	5.47516
-	0.534025	0.770568
-	0.237884	1.61851
-	0.898398	0.651582
-	0.177888	0.0609932
-	1.04405	0.672311
-	295.452	319.742
-	40.889	44.2418
-	57.0303	68.6915
-	34.0183	46.6643
-	60.175	65.1222
-	6.23416	7.67008
-	19.0578	20.101
-	268.65	253.431
-	114.036	157.292
-	220.185	1191.44
-	0.789619	0.56969
-	0.340588	0.737176
-	173.997	188.301
-	239.505	255.11
-	0.716615	0
-	0.938327	0.253867
-	0	0.253867
-	399.948	577.105
-	353.746	388.128
-	97.2113	100.454
-	0.313746	0.33954
-	0.359604	0.583751
-	0.553625	0.653607
-	0	0
-	94.9265	92.3586
-	456.494	946.878
-	0.830138	1.25774
-	1.07294	0.774101
-	1.04555	0.905205
-	4607.59	4724.81
-	0.369218	0.199786
-	65.8397	68.3388
-	1088.56	1090.78
-	679.172	1337.39
-	701.578	1065.55
-	575.697	578.525
-	36.6077	32.2115
-	71.0843	69.5141
-	139.997	157.787
-	31.3339	23.5698
-	34.8401	39.3802
-	0.922834	1.19844
-	513.803	0
-	8.60346	9.31077
-	0	1.03188
-	1.90787	2.10002
-	0.647018	0.466807
-	1.53927	0.208227
-	0	0.393628
-	0.403205	0.218177
-	0.759605	0.548036
-	0	0.544849
-	12.778	12.4061
-	28.9216	28.8607
-	1458.75	1574
-	37.7675	38.0032
-	94.0912	86.1569
-	252.295	194.397
-	0.490884	0.637489
-	1.67457	2.41632
-	0.844286	1.72587
-	645.867	349.483
-	0.340046	0.368002
-	0.661217	0.954103
-	0.256274	0.970698
-	0.16574	0
-	4.01989	7.07156
-	0.32507	0.351795
-	106.716	100.06
-	1.22054	1.21081
-	0.639289	0.461231
-	0.427678	0.981821
-	6922.58	4371.19
-	7.09997	2.75711
-	0.498095	0.808567
-	1.09045	0.23602
-	0.866826	0.469045
-	0.230349	0.623217
-	0.176104	0.762326
-	0	0.434226
-	0	0.393464
-	0	0.735694
-	1.84849	1.13539
-	0	0.413308
-	0	0
-	16.7758	20.8549
-	1708.06	1811.9
-	7581.71	8252.72
-	74.7468	93.7257
-	2318.21	1840.68
-	11.8835	16.0756
-	5.19833	4.1739
-	3.72824	3.8839
-	1.9177	1.55652
-	1.21062	0.655075
-	0.296685	0
-	1464.76	1541.38
-	66.9887	62.9095
-	15.5582	19.9079
-	0	1.17884
-	0.195394	0
-	0	0
-	0.294643	1.27546
-	0.578265	0
-	0.210374	0
-	0.947488	0.170897
-	0.348335	0.628288
-	0.444437	0.120244
-	119.108	112.385
-	4.66607	0.757481
-	0.807254	0.291207
-	0	0
-	0.447362	0.968281
-	2.08155	2.8301
-	0	0.668079
-	0	0.238449
-	1.05329	1.03955
-	4.04995	6.73327
-	69.2472	71.4073
-	0.413096	0.149019
-	0.326558	0.70681
-	0	0.352867
-	0.494541	0.713597
-	1.1301	0.778279
-	0.83467	0.812961
-	0.554305	0.399917
-	0.675458	0.146198
-	0.289072	0.625674
-	5.4668	4.43718
-	3.43319	6.31625
-	0	0
-	0.242282	1.311
-	0.877953	0.741093
-	4.77261	4.54518
Cnksr3	2.34498	1.53334
Ipcef1,Oprm1	28.6748	39.5503
Rgs17	0	0
Mtrf1l	3.58706	5.2859
Fbxo5	11.6701	7.46536
Syne1	0.129883	0.175107
-	0.328803	0
-	0.45432	0.740625
-	0.109931	0.59383
-	0.208971	0.227911
-	0.322749	0.641094
Syne1	9.03655	8.74188
Rmnd1,Zbtb2	27.8036	29.7392
H60c	0	0
Lrp11	0.433347	0.391681
Nup43	6.22552	9.01631
Lats1	16.1451	17.3779
Katna1	22.7723	27.6186
Ppil4	32.7457	30.7123
Zc3h12d	8.41978	8.19092
Shprh	12.5046	12.1238
Fbxo30	2.0243	0.896222
Epm2a	0	0
Sf3b5	42.165	38.1298
Plagl1	0.419957	0.40449
Fuca2	1.25683	0.677869
Adat2	3.16793	3.40886
Hivep2	23.3669	24.8159
Nmbr	0	0
Cited2	28.6443	26.4915
Txlnb	0	0.105469
Reps1	18.7384	19.9161
Nhsl1	8.08774	8.42268
Perp	0.696067	0
-	0	0
Olig3	0	0.241329
Ifngr1	34.9267	35.2919
Il22ra2	0	0
Il20ra	0	0
Map3k5	5.7732	6.91381
Map7	11.763	12.2174
Gm6251	149.171	147.438
Bclaf1	82.9098	79.5404
Mtfr2	0.673205	1.26297
Ahi1	4.28212	3.64681
Hbs1l	29.5995	28.0682
Aldh8a1	0	0
-	0.245791	0.53127
Sgk1	11.5125	16.9211
Raet1a,Raet1b,Raet1c,Raet1d,Raet1e	0.206399	0
H60b	0.657044	1.76861
Slc2a12	0.0696026	0
Slc18b1	0	0
Vnn3	0	0
Vnn1	0	0
Taar1	0	0
Taar2	0	0
Taar3	0	0
Taar4	0	0
Taar5	0	0
Taar7b	0	0
Taar7d	0	0
Taar7e	0	0
Taar7f	0	0
Taar8a	0	0
Stx7	13.1822	13.7386
Moxd1	0	0
Ctgf	0	0
Med23	12.2907	14.0519
Arg1	0.0473187	0.409438
Epb4.1l2	26.7249	27.4769
Samd3	0	0
Arhgap18	4.81051	4.68868
Ptprk	0.0765724	0.0826902
Themis	55.5153	51.114
Soga3	0	0
9330159F19Rik	0	0
Echdc1	4.43125	3.68773
Hddc2	16.6207	17.6644
Trdn	0	0
Sult3a1	0	0
Rsph4a	0	0
Zufsp	2.88278	4.62583
Trappc3l	0	0
Tspyl1	39.2801	37.5224
Tspyl4	9.77127	8.92743
Col10a1	0	0
Frk	0	0
Hs3st5	0	0
Hdac2	54.2922	45.9195
Lama4	0	0
Tube1	2.87477	3.52501
Fyn	215.256	207.434
Traf3ip2	7.34008	6.29254
Rev3l	27.599	27.2911
Cdk19	17.4257	17.9953
Slc22a16	0	0
Ddo	0	0
Mettl24	0	0
Wasf1	0.167425	0.458013
Zbtb24	11.9228	10.7022
Mical1	17.8061	18.0639
Ppil6	0	0
Cd164	169.007	177.448
Sesn1	34.3849	30.0162
Snx3	81.8154	78.9775
Ostm1	20.0935	16.4712
Sec63	32.3193	35.6112
Scml4	29.6956	34.4514
Pdss2	5.09913	2.06487
Bend3	1.67919	1.59339
-	9.02839	16.3497
Cd24a	43.3935	38.0633
Rtn4ip1	5.38803	4.43414
Atg5	11.7913	10.6611
Prep	12.7224	8.80733
Popdc3	0	0
Bves	0	0
Hace1	9.33467	11.9136
Ascc3	13.8259	16.4772
Sim1	0	0
Gp49a	0	0.0507416
Lilrb4	0	0.285761
Rfx6	0	0
Vgll2	0	0
Dcbld1	0	0
Nepn	0	0
Nus1	14.4169	16.347
Slc35f1	0	0
Pln	0	0
Asf1a	12.7935	11.8553
Msl3l2	2.5723	3.8084
Gja1	0	0
Hsf2	8.92887	5.90296
Pkib	0.128012	0.206304
Fabp7	0	0
Smpdl3a	10.6966	10.7146
Gcc2	10.5596	11.6777
Lims1	46.7309	51.1928
Ranbp2	29.979	34.2698
Ccdc138	4.66284	1.89269
Sh3rf3	0	0
Sowahc	0.167811	0
P4ha1	11.7501	11.662
Pla2g12b	0	0
Micu1	16.1772	17.3313
Dnajb12	13.9233	11.3281
Ascc1	17.4083	18.015
Spock2	0.567182	0.487872
Psap	150.659	162.195
4632428N05Rik,Cdh23	32.4183	35.1354
Gm17455	1.25347	0.0141365
Cdh23	0.93567	0.401521
Pcbd1	0	0
Tbata	0	0.244008
Prf1	1.22277	2.20578
Nodal	0	0
Lrrc20	1.81397	1.15188
Npffr1	0	0
Ppa1	20.463	31.854
Sar1a	34.0164	41.7639
Tysnd1	11.8142	12.1698
Aifm2	0	0
Neurog3	0	0
Tacr2	0	0
Slc25a16	7.90114	6.15102
Dna2	2.92119	1.69832
Rufy2	9.62716	11.3901
Pbld2	0.159005	0.172212
Pbld1	0.110609	0
Atoh7	0	0
Herc4	26.373	31.9436
Dnajc12	2.57548	2.23991
Ctnna3	0	0
Jmjd1c	28.5079	28.7152
-	1.19342	1.62628
Egr2	15.6755	15.9192
Rtkn2	0.623876	0.26934
Tmem26	0	0
Rhobtb1	0.0464786	0
Ank3	0	0
Ccdc6	15.0723	16.5236
Slc16a9	0.172647	0
Fam13c	0	0
Ipmk	5.42859	4.50605
Zwint	21.5272	27.3775
Pcdh15	0	0
Gnaz	0	0
Rab36	0	0
Bcr	7.95121	5.62756
Specc1l	13.0124	13.6407
Adora2a	2.52851	2.45599
Upb1	0.281219	0
Snrpd3	110.378	93.174
Ggt1	1.44137	1.84837
Ggt5	6.43045	4.33193
Derl3	0	0.185561
Chchd10	15.2043	13.7472
Vpreb3	0	1.08437
Gm5134	2.06089	2.11996
Zfp280b	14.7469	14.2118
Slc5a4a	0	0
S100b	0	0
2610028H24Rik	0	0
Mcm3ap	18.6359	18.1495
Lss	3.52344	3.32341
Spatc1l	0	0
Ftcd	0	0
Slc19a1	7.07084	5.81983
Pofut2	9.39614	12.6563
Itgb2	229.274	212.574
Pttg1ip	28.708	29.0873
Sumo3	25.5063	28.7089
Ube2g2	17.0455	15.5682
Tspear	0.0854975	0
Gm10024	0	0
Gm10142	0	0
Krtap12-1	0	0
Gm10100	0	0
Gm2696	0	0
Krtap10-10	0	0
Gm10318	0	0
Gm3285	0	0
1810043G02Rik	1.44655	1.66286
Dnmt3l	0	0
Icosl	0.459341	0.332064
Cstb	22.0709	29.038
Ilvbl	12.2737	10.2119
Slc1a6	0	0
Olfr1355	0	0
Olfr1354	0	0
Olfr8	0	0
Olfr1353	0	0
Olfr1352	0	0
Olfr1351	0	0
Olfr57	0	0
Vmn2r80	0	0
Vmn2r81	0	0
Vmn2r82	0	0
Vmn2r83	0	0
Madcam1	0	0
Tpgs1	13.3989	11.4653
Cdc34,Gzmm	16.5596	21.6337
Bsg	53.8835	49.1028
Hcn2	0.0665868	0
Fgf22	0	0
Fstl3	0.176237	0
Palm	2.32469	1.5276
Misp	0	0
Ptbp1	115.406	118.231
Prtn3	0	0
Elane	0	0
Cfd	0	0
Kiss1r	2.00366	1.9008
Arid3a	3.85411	3.08058
Wdr18	6.46323	6.64371
Grin3b	0.189929	0.172309
Cnn2	204.068	196.957
Abca7	16.19	16.0753
Hmha1	364.756	377.895
Gpx4	5.29706	7.3408
Stk11	48.0266	51.192
Atp5d	79.8576	94.8232
Midn	67.787	61.918
1600002K03Rik,Cirbp	53.7916	63.8547
Efna2	0.195113	0.175729
Mum1	26.4353	26.1778
Ndufs7	48.2611	50.4892
Dazap1	83.697	77.983
Rps15	670.218	644.161
Apc2	0.28264	0.186518
Reep6	0.159458	0
Plk5	0	0
Onecut3	0	0
Adat3,Scamp4	27.4194	28.1696
Csnk1g2	70.6885	73.5656
Izumo4	7.00696	7.84106
Dot1l,Sf3a2	41.8167	37.118
Amh	1.1952	0.399182
Oaz1	90.5034	99.1167
Sppl2b	8.84143	7.52323
Tmprss9	0.0540593	0.0590264
Gadd45b	10.8821	10.482
Thop1	2.45219	2.6801
Map2k2	26.717	27.2945
Zbtb7a	11.3409	11.7055
Eef2	619.098	637.551
Dapk3	17.541	19.6859
Zfr2	1.2735	0.829835
Matk	2.82592	3.49736
Apba3	8.08088	8.21059
Pip5k1c	30.3879	31.5512
Cactin	16.0042	12.6201
Tbxa2r	23.5326	25.5783
Mfsd12	1.65918	3.4313
Dohh	12.3019	10.853
2210404O07Rik	1.21501	2.21492
Aes	237.904	219.474
Tle2	3.65796	3.73048
-	1.51975	1.49407
Ankrd24	0.731769	0.517337
Gm10778	1.29921	1.26136
Zfp433	6.79733	8.49933
Gm10778	1.20314	1.3501
Zfp433	3.76717	4.94716
Zfp873	5.22866	3.3545
AU041133	1.55785	2.30107
Tdg	14.9079	15.5084
Hcfc2	10.2468	11.5996
Txnrd1	17.2115	14.4573
Eid3	0.346968	0.565744
Chst11	0.40659	0.881817
D10Wsu102e	23.4844	23.2432
A230046K03Rik	18.7301	22.9889
1500009L16Rik	0.561062	0.602147
Tcp11l2	36.159	32.5524
Polr3b	14.5145	11.5569
Rfx4	0	0
Ric8b	9.21641	7.5296
AI597468	7.55249	7.39218
Btbd11	4.44549	4.91626
Pwp1	15.3636	14.1532
Ascl4	0	0
Fbxo7	13.6647	16.9166
Syn3	0	0.246084
Timp3	0	0
-	3.54667	3.02007
BC030307	0.433175	0.35562
Nt5dc3	3.32624	2.88107
1700113H08Rik	0	0
Pah	0	0
Igf1	0.0482043	0
Pmch	0	0
Nup37	5.19258	4.68686
Ccdc53	19.2766	15.3286
Gnptab	8.66147	8.25626
Sycp3	0.142877	0
Arl1	16.2807	19.7335
Slc5a8	0	0
Uhrf1bp1l	19.5089	20.0415
Anks1b	0	0
Ikbip	0.465175	0.941879
Cdk17	69.1552	62.0829
Lta4h	62.7474	52.1821
Hal	0.077909	0.0844855
Ccdc38	0.216841	0.391621
Ntn4	0.0813418	0.177399
Usp44	0.188086	0
Fgd6	0.589517	0.425107
Nr2c1	4.87316	3.46076
Ndufa12	16.6008	17.1525
Tmcc3	6.99528	5.65471
Ccdc41	15.826	14.2539
Ube2n	15.2876	15.7748
Eea1	0.798375	0.46655
Btg1	293.379	292.157
Dcn	0	0
Lum	0	0
Kera	0	0
Epyc	0	0
Ccer1	0	0
Atp2b1	17.2145	15.2676
Galnt4,Poc1b	9.37127	8.98836
Dusp6	40.7728	39.6011
Kitl	0.194815	0.139098
Gm4301	0	0
Gm4307	0	0
Gm4302,Gm4307	0	0
Gm4301	0	0
Cep290	0.82168	0.837023
1700017N19Rik	0	0
Mgat4c	0	0
Rassf9	0	0
Slc6a15	0	0
Gm20765,Gm4340	0	0
Gm20765	0	0
Ccdc59	19.6939	25.672
Ppfia2	0	0
Lin7a	0	0
Ppp1r12a	40.2637	41.0171
Pawr	0	0
E2f7	0.4987	0.459712
Csrp2	0	0
Zdhhc17	2.33087	2.66849
Osbpl8	32.0516	34.4339
Bbs10	0.847288	0.568318
Nap1l1	47.3644	46.4056
Phlda1	7.96354	6.76252
Krr1	10.9587	12.5207
Glipr1l1	0	0
Glipr1l2	0	0
Caps2	0	0
Kcnc2	0	0
Zfc3h1	22.1409	25.254
A930009A15Rik	0	0
Tspan8	0	0
Ptprr	0	0
Ptprb	0	0
Rab3ip	2.9891	3.41032
-	8.30597	15.0944
-	0.62858	0.224429
Best3	0	0
Lrrc10	0	0
Cpm	3.48528	2.8355
-	1.07886	1.16674
Mdm1	3.14235	2.91151
Il22	0	0
Ifng	0	0
Grip1	0	0
Tmbim4	19.4231	18.3418
Llph	16.3723	16.3415
Wif1	0	0
Gns	9.61062	9.63583
D930020B18Rik	0	0
BC048403	2.44832	2.06441
Avpr1a	0	0
Ppm1h	20.5757	21.2431
-	0	0.391138
Fam19a2	0	0
Lrig3	0.0983921	0
Ctdsp2	42.6539	50.9497
Avil	0.475323	0.245945
Mettl1	6.02628	4.37383
Cyp27b1	0	0.10452
Cdk4	83.3204	78.1512
Agap2	20.5468	21.9073
B4galnt1	132.031	141.759
Dctn2	21.5213	19.5432
Ddit3	23.6479	24.993
Arhgap9	122.144	117.652
R3hdm2	19.3146	17.5355
Stac3	0.889825	0.942137
Ndufa4l2	0	0
Stat6	49.5861	44.6291
Tmem194	5.35947	5.40332
Myo1a	0.103438	0.11183
Tac2	0	0
Zbtb39	1.87998	1.74252
Rdh1	0.0681728	0
Rdh9	0	0
Rdh16	0	0
Rdh19	0	0
BC089597	0	0
Sdr9c7	0	0
Prim1	12.1116	11.0908
Naca	49.5216	47.9946
Ptges3	48.9541	45.0448
Atp5b	259.083	238.271
Baz2a	45.0336	44.1359
Gls2	0	0
Mip,Timeless	8.86846	9.57441
Apon	0.177483	0
Apof	0	0
Stat2	19.9969	46.4524
Pan2	21.2378	18.4174
Cnpy2	16.729	19.4533
Cs	49.1423	48.4427
Ankrd52	26.0045	26.0332
Rnf41	8.98528	10.7698
Myl6b,Smarcc2	36.4774	33.2337
Myl6b	5.0343	2.72315
Erbb3	0.602968	0.439004
Pmel,Wibg	33.2464	34.8468
Mmp19	0.0903032	0.219772
Dnajc14,Sarnp	27.9545	26.7437
Cd63	0	0
Itga7	0.151605	0.219106
Olfr9	0	0
Olfr763	0	0
Olfr774	0	0
Olfr775	0	0
Olfr776	0	0
Olfr780	0	0
Olfr781	0	0
Olfr782	0	0
Olfr784	0	0
Olfr786	0	0
Olfr787	0	0
Olfr788	0	0
Olfr790	0	0
Olfr791	0	0
Olfr792	0	0
Olfr794	0	0
Olfr799	0	0
Olfr800	0	0
Olfr804	0	0
Olfr808	0	0
Olfr809	0	0
Olfr813	0	0
Olfr820	0	0
Olfr821	0	0
Olfr822	0	0
Tespa1	64.6788	54.7412
-	0	0
Oprm1	0	0
Vip	0	0
Myct1	0	0
Esr1	0.0580634	0.0627195
Ccdc170	0	0.10253
1700052N19Rik	13.8595	12.664
Akap12	2.80127	2.75279
Mthfd1l	5.68733	4.67627
Plekhg1	0	0
Iyd	0	0
Ppp1r14c	0.218179	0
Pcmt1	20.713	15.4738
Ginm1	12.4397	16.8702
-	1.60385	0.0435832
Tab2	42.7028	44.2621
Ust	0.420805	0.284664
Sash1	0.111172	0.0302315
Samd5	0	0
Stxbp5	11.4074	8.1854
Adgb	0	0
Rab32	2.28481	1.46043
Grm1	0	0
Utrn	32.1129	36.3066
Stx11	0.872991	2.09921
Zc2hc1b	0	0
Ltv1	13.9256	17.0396
Phactr2	4.2757	2.76464
Pex3	11.4402	12.6738
Aig1	3.4494	3.90676
Gpr126	0	0
Vta1	18.7333	15.9713
Gje1	0	0
Heca	62.3794	64.4312
Abracl	86.324	86.3409
Ect2l	0.0809673	0
Ccdc28a	9.1965	9.95209
Hebp2	0	0
D10Bwg1379e	0.0243402	0.0794645
Gm4922	0	0
Tnfaip3	45.7263	47.1061
Slc35d3	1.20898	1.30508
Pex7	9.24257	8.08379
Pde7b	0.129562	0.349017
Myb	21.3258	20.5775
4930444G20Rik	0	0
E030030I06Rik	2.84997	4.20457
H60b,Raet1a	26.0997	26.844
Tbpl1	16.8879	17.1778
Tcf21	0	0
Eya4	0	0
Rps12	89.1359	79.5758
Taar6	0	0
Taar7a	0	0
Taar8b	0	0
Taar8c	0	0
Taar9	0	0
Enpp1	1.18301	0.623177
Enpp3	0	0
Arg1	0.556158	0
Akap7	0.674248	0.75466
Smlr1	0	0
Tmem200a	0	0
L3mbtl3	25.4623	22.9322
Lama2	0	0
2310057J18Rik	0	0
Rnf146	16.6204	16.2447
Rspo3	0	0
Cenpw	2.89493	2.21033
Hint3,Trmt11	19.1417	22.398
Ncoa7	34.7863	42.0538
Hey2	0	0
Tpd52l1	0	0
Gm3258	57.8032	60.3738
Rnf217	0	0
Nkain2	0	0
Clvs2	0	0
Gm4794	0	0
Zufsp	20.5607	28.519
Rwdd1	17.3978	19.6797
Fam26d	0	0
Fam26e	0	0
Fam26f	4.30392	6.83386
Dse	0.946344	1.49946
Nt5dc1	20.0189	19.1015
Marcks	25.8412	22.6617
Rfpl4b	0	0
Fam229b	0	0
Wisp3	0.137974	0.149832
-	0.369531	0.398308
Traf3ip2	12.1613	11.7017
-	4.75906	2.89652
2010001E11Rik	0	0
BC021785,G630090E17Rik	1.06598	0.674794
AI317395	0	0
Slc16a10	14.3094	10.045
Gtf3c6,Rpf2	26.3045	26.5732
Amd1	14.4415	12.2742
Cdc40	19.8124	18.7394
Gpr6	0	0
Fig4	8.76524	6.18246
Smpd2	12.1809	10.8147
Ccdc162	0.079654	0.778758
-	0.460847	1.50403
Cep57l1	7.36567	8.74312
Armc2	0.0471837	0.0511798
Foxo3	19.548	17.8349
Lace1	2.01797	2.24608
Nr2e1	0	0
Scml4	1.70807	2.2013
Sobp	0	0
1700021F05Rik	13.1242	6.17657
Qrsl1	7.35461	7.52536
Aim1	18.9398	21.4819
Prdm1	0.380829	0.413492
Lin28b	0	0
Grik2	0	0
Fam162b	0	0
Gprc6a	0	0
Ros1	0	0
Gopc	9.03491	10.7504
Cep85l	1.70108	1.95164
Mcm9	6.1913	4.95102
Fam184a	0.210566	0.056977
Man1a	37.3043	39.4394
Tbc1d32	0.638907	0.729342
Serinc1	62.5644	57.3883
Dux	0	0
Gm4981	0	0
Edar	0	0
2017-09-10	0	0.145949
Oit3	0.0763125	0
Mcu	15.5648	15.1212
Dnajb12	1.86941	2.64427
Ddit4	64.9847	62.3958
Anapc16	25.7363	31.5283
Chst3	0.171926	0.1867
Cdh23	0.942771	0.594949
Slc29a3	10.2765	10.2766
Unc5b	0	0
Sgpl1	17.7584	18.0278
Adamts14	1.73545	1.53732
Pald1	0	0
Eif4ebp2	83.0366	78.9119
H2afy2	0	0
Col13a1	0	0
2010107G23Rik	0.449003	0.64298
Tspan15	0	0
Hk1	26.3789	31.6301
Hkdc1	0.053305	0.0576522
Supv3l1	9.98474	7.98247
Vps26a	16.7326	18.4769
Srgn	73.286	87.0608
2510003E04Rik	9.54461	8.89893
Ddx21	43.3005	42.1761
Ddx50	30.292	32.555
Stox1	0	0
Ccar1	34.9435	40.4091
Tet1	9.5672	9.20356
Hnrnph3	19.5178	18.2497
Mypn	0	0
Sirt1	19.8913	14.6168
Lrrtm3	0	0
Reep3	8.09071	8.33315
Nrbf2	12.483	11.359
Ado	6.03506	7.44573
Zfp365	1.34068	2.41228
Arid5b	9.0095	10.3095
1700040L02Rik	0.563752	0.407465
Cdk1	3.59214	2.26822
Phyhipl	0	0
Bicc1	0	0
Tfam	13.6352	12.7476
Ube2d1	34.9189	32.3307
Cisd1	7.54617	6.21453
Rtdr1	0	0
Gucd1	13.783	14.9763
Fam211b	0.133351	0.0482584
Susd2	0.767991	1.2348
Cabin1	21.0442	23.2111
Ddt	26.6541	15.0624
Gstt3	0.13138	0.141955
Gstt1	0	0
Gstt4	0	0
Gstt2	4.21526	4.99483
Mif	82.1916	71.1657
Smarcb1	33.6998	35.5193
Mmp11	3.23574	5.76775
Gm867	0	0
Slc5a4b	0	0.146748
Prmt2	7.50343	5.89948
Dip2a	0.911994	0.86859
Pcnt	9.54684	10.0727
Ybey	1.29687	1.16832
Col6a2	0.388188	0.328418
Col6a1	0	0
Pcbp3	1.22687	2.01775
Col18a1	0.0645983	0
Adarb1	0.304102	0.46233
[truncated: 21,357 more rows]
